# Supplementary material for: One-pot fabrication of carboxyl-functionalized biocompatible magnetic nanocrystals for conjugation with targeting agents
Source: Royal Society of Chemistry journal article supplement (doi:10.1039/c0nj00067a), 2010-01-01
Supplement: c0nj00067a.pdf [file c0nj00067a.pdf]

## SUPPORTING INFORMATION

### One-pot fabrication of carboxyl-functionalized biocompatible magnetic nanocrystals for conjugation with targeting agents

Chichong Lu,<sup>a</sup> Zhe-Shan Quan,<sup>b</sup> Jung Chul Sur,<sup>c</sup> Sun-Hee Kim,<sup>d</sup> Choong Hun Lee<sup>c</sup> and Kyuyun Chai\*<sup>a</sup>

<sup>a</sup> Department of Bionanochemistry, Wonkwang University, Iksan, Jeonbuk 570-749, Korea. Fax: 82 63 8414893; Tel: 82 63 8506230; E-mail: geuyoon@wonkwang.ac.kr

<sup>b</sup> College of Pharmacy, Yanbian University, Yanji, Jilin 133000, P. R. China.

<sup>c</sup> Division of Microelectronics and Display Technology, Wonkwang University, Iksan, Jeonbuk 570-749, Korea.

<sup>d</sup> Department of Nuclear Medicine, Chonbuk National University Medical School and Hospital, Jeonju, Jeonbuk 561-712, Korea.

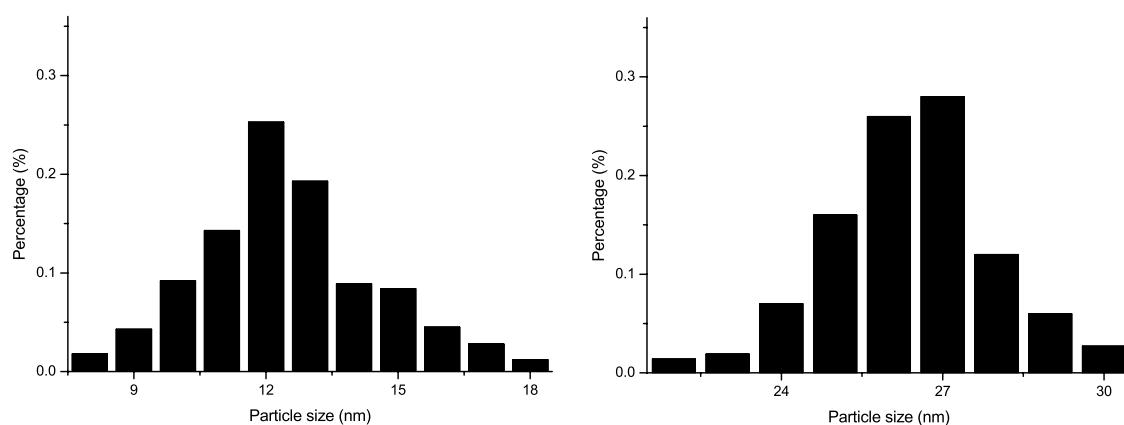

**Fig S1.** Histograms show the size distribution of the (a) 12-nm and (b) 27-nm MnMEIO nanocrystals.

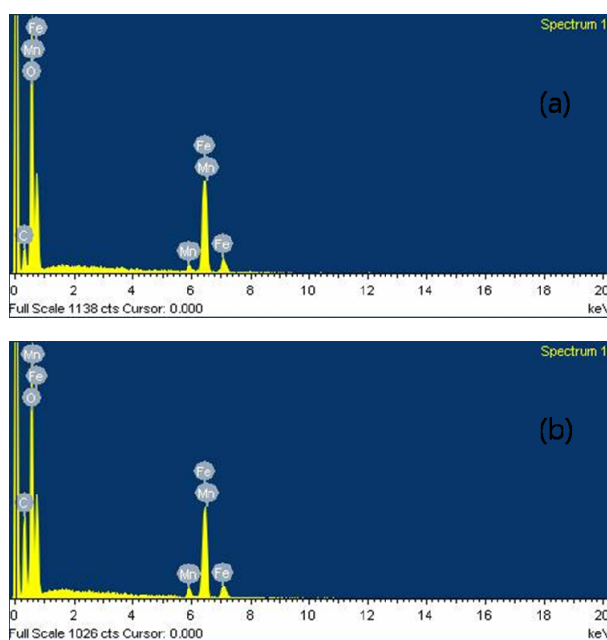

**Fig. S2.** EDX data of (a) 12-nm and (b) 27-nm MnMEIO nanocrystals.

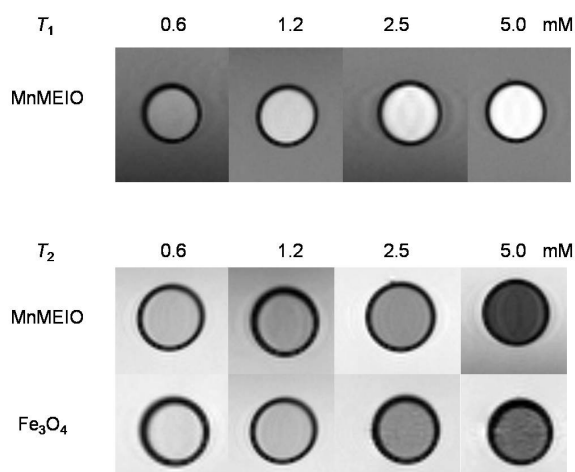

**Fig. S3.**  $T_1$  and  $T_2$ -weighted MR images of phantoms at various concentrations with different contrast magnetic fluids. The 12-nm MnMEIO exhibited much stronger enhancement in both  $T_1$ - and  $T_2$ -weighted MRI than the  $Fe_3O_4$  nanocrystal.

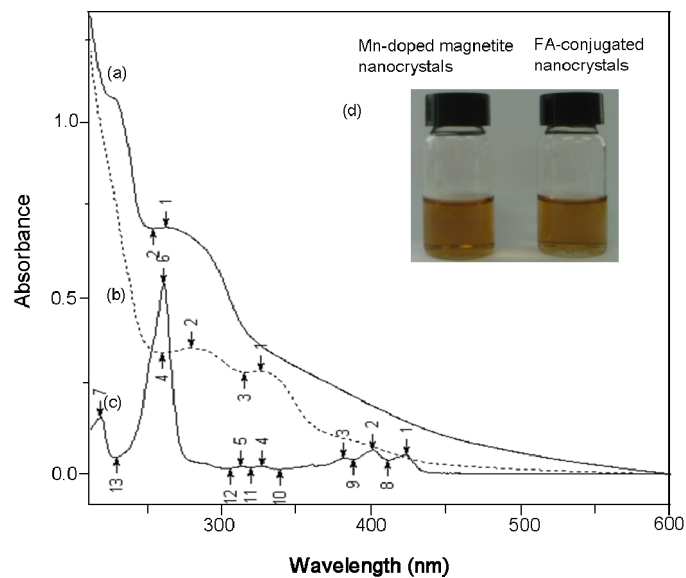

**Fig. S4.** UV-vis absorption spectra of a) 9-AA, b) 12-nm MnMEIO nanocrystals, and c) 9AA-conjugated nanocrystals, shown together with a d) photograph of the 12-nm MnMEIO nanocrystals and folic acid-conjugated nanocrystals dispersed in phosphate-buffered saline (pH = 7.4).

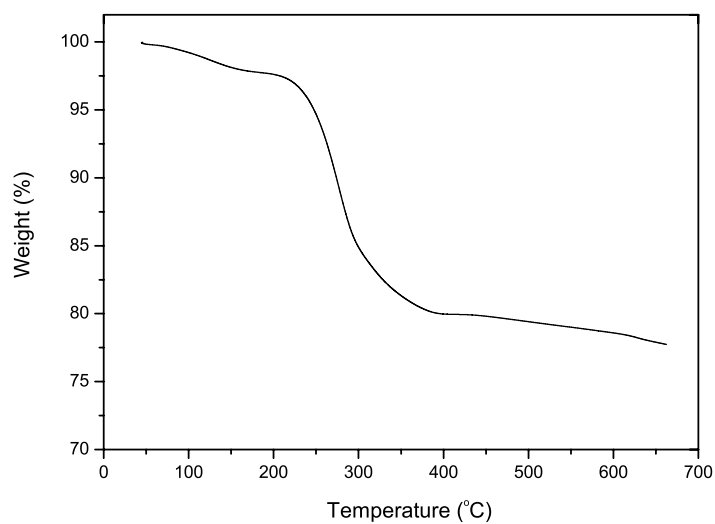

**Fig. S5.** Thermal analysis curve of 12-nm MnMEIO nanocrystals.

**Table S1.** Elemental composition in wt % obtained from elemental analysis of the 12 nm MnMEIO nanocrystals and 9-AA conjugated nanocrystals

|          | <i>W</i> (wt %)     |                              |
|----------|---------------------|------------------------------|
|          | MnMEIO nanocrystals | 9-AA conjugated nanocrystals |
| Nitrogen | 2.6                 | 2.9                          |
| Carbon   | 37.5                | 25.1                         |

### MR imaging

The MnMEIO contrast fluids, including the control sample of Fe<sub>3</sub>O<sub>4</sub>, were diluted in test tubes for different concentrations. MR imaging of phantoms was performed with a standard knee coil using a 1.5T clinical MR scanner (Bruker) to obtain  $T_2$ -axial images. The measurement parameters were as follows: field of view, 4 cm × 4 cm; matrix size, 256 × 256; repetition time (TR), 3500 ms; and echo time (TE), 36 ms.
